# Supplementary material
Source: publisher figshare collection journal article supplement (https://gsajournals.figshare.com/articles/dataset/_/24794793)

Figure S1

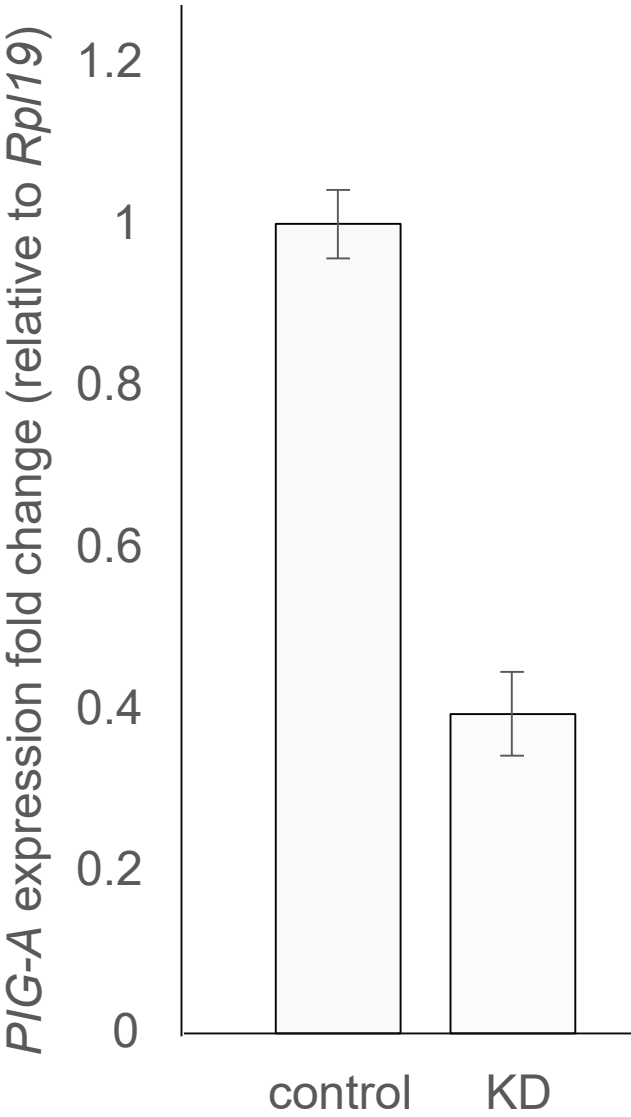

Supplement: Supplementary file [file 1]
